# Supplementary material for: PEO-b-PCL/Tween 80/cyclodextrin systems: from bioinspired fabrication to possible nasal administration of ropinirole hydrochloride
Source: Royal Society of Chemistry journal article supplement (doi:10.1039/d4tb00489b), 2024-01-01
Supplement: d4tb00489b1.pdf [file d4tb00489b1.pdf]

**Supporting Information for publication**

**PEO-b-PCL/Tween 80/Cyclodextrin systems: from bioinspired fabrication to possible nasal administration of Ropinirole Hydrochloride**

Elmina-Marina Saitani, <sup>a</sup> Natassa Pippa, <sup>\*a</sup> Diego Romano Perinelli, <sup>b</sup> Aleksander Forys, <sup>c</sup> Paraskevi Papakyriakopoulou, <sup>a</sup> Nefeli Lagopati, <sup>d,e</sup> Giulia Bonacucina, <sup>b</sup> Barbara Trzebicka, <sup>c</sup> Maria Gazouli, <sup>d</sup> Stergios Pispas, <sup>\*f</sup> and Georgia Valsami <sup>a</sup>

<sup>a</sup> Department of Pharmacy, School of Health Sciences, National and Kapodistrian University of Athens, Panepistimiopolis, 15771 Zografou, Greece; elminasait@pharm.uoa.gr (E.-M.S.); natpippa@pharm.uoa.gr (N.P.); ppapakyr@pharm.uoa.gr (P.P.); valsami@pharm.uoa.gr (G.V.)

<sup>b</sup> School of Pharmacy, Chemistry Interdisciplinary Project (CHIP), University of Camerino, Via Madonna delle Carceri, 62032 Camerino, Italy; diego.perinelli@unicam.it (D.R.P.); giulia.bonacucina@unicam.it (G.B.)

<sup>c</sup> Centre of Polymer and Carbon Materials, Polish Academy of Sciences, 34, M. Curie-Skłodowskiej St, 41-819 Zabrze, Poland; aforys@cmpw-pan.pl (A.F.); barbara.trzebicka@cmpw-pan.edu.pl (B.T.)

<sup>d</sup> Department of Basic Medical Science, Laboratory of Biology, School of Medicine National and Kapodistrian University of Athens, 11527 Athens, Greece; nlagopati@med.uoa.gr (N.L.), mgazouli@med.uoa.gr (M.G.)

<sup>e</sup> Biomedical Research Foundation, Academy of Athens, 11527 Athens, Greece; (N.L.)

<sup>f</sup> Theoretical and Physical Chemistry Institute, National Hellenic Research Foundation, 48 Vassileos Constantinou Avenue, 11635 Athens, Greece; pispas@eie.gr (S.P.)

\* Author to whom correspondence should be addressed.

### The synthetic procedure of the PEO-b-PCL block copolymers

Block copolymer synthesis: In a typical synthesis of PEO-b-PCL (copolymer PEO-b-PCL<sub>1</sub>), monomethoxy-PEO of 5,000 g/mol molar mass was utilized as the macromolecular initiator (and first block) in the presence of stannous octoate as the catalyst (SnOct<sub>2</sub>). At first, PEO homopolymer (2 g) was dissolved in toluene (20 mL) and transferred to a spherical flask. Toluene was evaporated partially in a rotary evaporator (one-fourth of the toluene initial volume remaining), leaving the dried polymer as a concentrated toluene solution.  $\epsilon$ -caprolactone monomer (0.5 g, distilled over CaH<sub>2</sub> in a vacuum line) was added to the flask under a nitrogen atmosphere, and then two drops of SnOct<sub>2</sub> solution (as received) were added through a rubber septum. The flask was then immersed in an oil bath at 130 °C and left for CL polymerization for 3 hours. Afterwards, the contents were allowed to cool at room temperature, the mixture was diluted with 15 mL of CHCl<sub>3</sub>, and the polymer was precipitated in hexane. The solvents were decanted, and the obtained solid was dried in a vacuum oven for 48 hours at room temperature.

**Table S1. The molecular characteristics of the PEO-b-PCL block copolymers**

| Copolymer              | M <sub>w</sub> <sup>a</sup> (g/mol) | M <sub>w</sub> /M <sub>n</sub> <sup>a</sup> | %wt PCL <sup>b</sup> | M <sub>w</sub> <sup>c</sup> (g/mol, corrected) |
|------------------------|-------------------------------------|---------------------------------------------|----------------------|------------------------------------------------|
| PEO-b-PCL <sub>1</sub> | 11,100                              | 1.04                                        | 15                   | 5,900                                          |
| PEO-b-PCL <sub>2</sub> | 12,500                              | 1.18                                        | 30                   | 7,100                                          |
| PEO-b-PCL <sub>3</sub> | 14,400                              | 1.42                                        | 53                   | 10,600                                         |

<sup>a</sup> by SEC in THF

<sup>b</sup> by <sup>1</sup>H-NMR in CDCl<sub>3</sub>

<sup>c</sup> corrected by using composition from NMR and PEO block molecular weight

**Table S2.** Molecular characteristics of the utilized compounds.

| <b>Compound</b>                             | <b>Molecular weight (g/mol)</b> |
|---------------------------------------------|---------------------------------|
| <b>PEO-b-PCL<sub>1</sub></b>                | 5,900 (15% wt PCL)              |
| <b>PEO-b-PCL<sub>2</sub></b>                | 7,100 (30% wt PCL)              |
| <b>PEO-b-PCL<sub>3</sub></b>                | 10,600 (53% wt PCL)             |
| <b>Tween 80</b>                             | 1,310                           |
| <b><math>\beta</math>-CD</b>                | 1,135                           |
| <b>Methyl-<math>\beta</math>-CD</b>         | 1,303.3                         |
| <b>Hydroxy-propyl-<math>\beta</math>-CD</b> | 1,541.54                        |
| <b>Ropinirole hydrochloride</b>             | 296.83                          |

**Table S3.** Calorimetric heating parameters of pure compounds and their mixtures in the solid state. These calorimetric parameters correspond to the thermograms in Figures 2, S1, and S2.

| Sample                             | $T_{\text{onset,m}}$<br>(°C) <sup>a</sup> | $T_m$<br>(°C) <sup>b</sup> | $\Delta T_{1/2,m}$<br>(°C) <sup>c</sup> | $\Delta H_m$<br>(KJ mol <sup>-1</sup> ) <sup>d</sup> | $T_{\text{onset,s}}$<br>(°C) | $T_s$<br>(°C) | $\Delta T_{1/2,s}$<br>(°C) | $\Delta H_s$<br>(KJ mol <sup>-1</sup> ) | $T_{\text{onset,t}}$<br>(°C) | $T_t$<br>(°C) | $\Delta T_{1/2,t}$<br>(°C) | $\Delta H_t$<br>(KJ mol <sup>-1</sup> ) |
|------------------------------------|-------------------------------------------|----------------------------|-----------------------------------------|------------------------------------------------------|------------------------------|---------------|----------------------------|-----------------------------------------|------------------------------|---------------|----------------------------|-----------------------------------------|
| PEO-b-PCL <sub>1</sub>             | 54.56                                     | 57.50                      | 3.18                                    | -34.61                                               | 191.67                       | 195.33        | 4.25                       | 9.28                                    | 35.51                        | 42.17         | 5.31                       | 0.44                                    |
| PEO-b-PCL <sub>2</sub>             | 56.36                                     | 62.50                      | 10.55                                   | -34.26                                               | 192.31                       | 194.17        | 81.29                      | 70.83                                   | 37.03                        | 49.00         | 10.81                      | 5.81                                    |
| PEO-b-PCL <sub>3</sub>             | 52.56                                     | 58.00                      | 6.31                                    | -40.37                                               | 179.33                       | 186.83        | 7.95                       | 7.74                                    | 38.85                        | 44.00         | 4.13                       | 0.81                                    |
| Tw80                               | 25.43                                     | 59.50                      | 39.05                                   | -2.07                                                | -                            | -             | -                          | -                                       | -                            | -             | -                          | -                                       |
| PEO-b-PCL <sub>1</sub> /Tw80       | 49.07                                     | 55.00                      | 5.51                                    | -40.24                                               | -                            | -             | -                          | -                                       | -                            | -             | -                          | -                                       |
| PEO-b-PCL <sub>2</sub> /Tw80       | 48.14                                     | 53.67                      | 11.05                                   | -20.09                                               | 54.47                        | 63.50         | 9.27                       | 12.01                                   | -                            | -             | -                          | -                                       |
| PEO-b-PCL <sub>3</sub> /Tw80       | 48.03                                     | 54.33                      | 5.16                                    | -33.50                                               | -                            | -             | -                          | -                                       | -                            | -             | -                          | -                                       |
| MβCD                               | 145.13                                    | 179.50                     | 17.63                                   | -1.29                                                | 68.20                        | 75.33         | 6.91                       | -0.02                                   | -                            | -             | -                          | -                                       |
| PEO-b-PCL <sub>1</sub> /MβCD       | 52.84                                     | 56.00                      | 3.87                                    | -38.85                                               | 188.25                       | 195.67        | 7.96                       | 6.97                                    | -                            | -             | -                          | -                                       |
| PEO-b-PCL <sub>2</sub> /MβCD       | 46.66                                     | 53.00                      | 5.80                                    | -25.54                                               | 194.46                       | 199.00        | 5.81                       | 6.96                                    | -                            | -             | -                          | -                                       |
| PEO-b-PCL <sub>3</sub> /MβCD       | 50.36                                     | 56.33                      | 5.17                                    | -37.54                                               | 176.66                       | 184.50        | 9.24                       | 13.37                                   | 270.41                       | 272.33        | 4.86                       | -1.18                                   |
| HPβCD                              | 142.17                                    | 147.33                     | 20.30                                   | -5.70                                                | -                            | -             | -                          | -                                       | -                            | -             | -                          | -                                       |
| PEO-b-PCL <sub>1</sub> /HPβCD      | 52.03                                     | 55.17                      | 3.39                                    | -30.32                                               | 189.86                       | 194.00        | 5.57                       | 17.84                                   | 262.59                       | 264.33        | 4.14                       | -3.03                                   |
| PEO-b-PCL <sub>2</sub> /HPβCD      | 46.29                                     | 53.00                      | 6.05                                    | -21.33                                               | 189.96                       | 195.50        | 6.78                       | 9.24                                    | 261.24                       | 263.50        | 6.16                       | -1.49                                   |
| PEO-b-PCL <sub>3</sub> /HPβCD      | 49.71                                     | 56.17                      | 6.21                                    | -39.71                                               | -                            | -             | -                          | -                                       | -                            | -             | -                          | -                                       |
| Tw80/MβCD                          | 123.78                                    | 147.50                     | 27.10                                   | 0.50                                                 | 184.83                       | 187.00        | 6.65                       | -1.07                                   | -                            | -             | -                          | -                                       |
| PEO-b-PCL <sub>1</sub> /Tw80/MβCD  | 48.84                                     | 53.17                      | 3.65                                    | -24.88                                               | 161.00                       | 181.67        | 40.29                      | 3.81                                    | 111.73                       | 147.33        | 24.25                      | -0.68                                   |
| PEO-b-PCL <sub>2</sub> /Tw80/MβCD  | 17.29                                     | 51.33                      | 6.34                                    | -26.28                                               | 180.89                       | 188.17        | 14.42                      | 1.60                                    | 126.96                       | 132.17        | 18.41                      | -0.81                                   |
| PEO-b-PCL <sub>3</sub> /Tw80/MβCD  | 46.43                                     | 54.33                      | 6.25                                    | -37.58                                               | 166.70                       | 176.17        | 10.08                      | 4.52                                    | -                            | -             | -                          | -                                       |
| Tw80/HPβCD                         | 121.29                                    | 132.33                     | 16.19                                   | -0.74                                                | -                            | -             | -                          | -                                       | -                            | -             | -                          | -                                       |
| PEO-b-PCL <sub>1</sub> /Tw80/HPβCD | 51.43                                     | 55.83                      | 4.05                                    | -36.04                                               | 155.15                       | 180.67        | 25.55                      | -1.38                                   | -                            | -             | -                          | -                                       |
| PEO-b-PCL <sub>2</sub> /Tw80/HPβCD | 55.64                                     | 60.00                      | 4.14                                    | -22.13                                               | 179.08                       | 188.17        | 9.98                       | 5.23                                    | 226.60                       | 228.83        | 5.12                       | -2.06                                   |
| PEO-b-PCL <sub>3</sub> /Tw80/HPβCD | 46.80                                     | 54.67                      | 6.26                                    | -34.34                                               | 174.59                       | 183.33        | 9.46                       | 10.88                                   | 205.11                       | 207.50        | 5.67                       | -2.35                                   |

<sup>a</sup> $T_{\text{onset}}$ : the temperature at which the thermal event starts.

<sup>b</sup> $T$ : the temperature at which heat capacity at constant pressure is at its maximum.

<sup>c</sup> $\Delta T_{1/2}$ : half width at the half peak height of the transition.

<sup>d</sup> $\Delta H$ : transition enthalpy normalized per mol of each system. m: main transition; s: secondary; t: trinary transition.

**Table S4.** The physicochemical characteristics of ternary systems in **A.** Water-HPLC grade, **B.** FBS/PBS mixture (10:90), and **C.** buffer solution (pH=5.6 at the temperature of 34 °C).

| <b>A. Dispersed in Water-HPLC grade</b> |            |                                                  |                        |                        |                                                |                            |
|-----------------------------------------|------------|--------------------------------------------------|------------------------|------------------------|------------------------------------------------|----------------------------|
| <b>Colloidal dispersions</b>            | <b>w/w</b> | <b>R<sub>h</sub> (Cumulant) (nm)<sup>1</sup></b> | <b>PDI<sup>2</sup></b> | <b>Number of peaks</b> | <b>R<sub>h</sub> (Contin) (nm)<sup>3</sup></b> | <b>Weight of Peak (%)</b>  |
| (PEO-b-PCL <sub>1</sub> /Tw80)/MβCD     | 80:20      | 87                                               | 0.3 <sub>6</sub>       | 2                      | 1) 12<br>2) 116                                | 1) 7%<br>2) 93%            |
| (PEO-b-PCL <sub>2</sub> /Tw80)/MβCD     | 80:20      | 69                                               | 0.4 <sub>7</sub>       | 2                      | 1) 13<br>2) 120                                | 1) 14%<br>2) 85%           |
| (PEO-b-PCL <sub>3</sub> /Tw80)/MβCD     | 80:20      | 39                                               | 0.4 <sub>3</sub>       | 2                      | 1) 19<br>2) 96                                 | 1) 38%<br>2) 62%           |
| (PEO-b-PCL <sub>1</sub> /Tw80)/HPβCD    | 80:20      | 91                                               | 0.3 <sub>6</sub>       | 2                      | 1) 10<br>2) 99                                 | 1) 5%<br>2) 95%            |
| (PEO-b-PCL <sub>2</sub> /Tw80)/HPβCD    | 80:20      | 81                                               | 0.5 <sub>1</sub>       | 2                      | 1) 12<br>2) 120                                | 1) 15%<br>2) 85%           |
| (PEO-b-PCL <sub>3</sub> /Tw80)/HPβCD    | 80:20      | 37                                               | 0.4 <sub>7</sub>       | 2                      | 1) 17<br>2) 88                                 | 1) 40%<br>2) 60%           |
| <b>B. Dispersed in FBS/PBS mixture</b>  |            |                                                  |                        |                        |                                                |                            |
| <b>Colloidal dispersions</b>            | <b>w/w</b> | <b>R<sub>h</sub> (Cumulant) (nm)<sup>1</sup></b> | <b>PDI<sup>2</sup></b> | <b>Number of peaks</b> | <b>R<sub>h</sub> (Contin) (nm)<sup>3</sup></b> | <b>Weight of Peak (%)</b>  |
| (PEO-b-PCL <sub>1</sub> /Tw80)/MβCD     | 80:20      | 73                                               | 0.5 <sub>2</sub>       | 3                      | 1) 4<br>2) 17<br>3) 137                        | 1) 12%<br>2) 22%<br>3) 66% |
| (PEO-b-PCL <sub>2</sub> /Tw80)/MβCD     | 80:20      | 67                                               | 0.4 <sub>8</sub>       | 3                      | 1) 3<br>2) 10<br>3) 192                        | 1) 5%<br>2) 24%<br>3) 71%  |
| (PEO-b-PCL <sub>3</sub> /Tw80)/MβCD     | 80:20      | 40                                               | 0.5 <sub>2</sub>       | 3                      | 1) 3<br>2) 12<br>3) 83                         | 1) 7%<br>2) 27%<br>3) 65%  |
| (PEO-b-PCL <sub>1</sub> /Tw80)/HPβCD    | 80:20      | 48                                               | 0.5 <sub>4</sub>       | 3                      | 1) 3<br>2) 12<br>3) 175                        | 1) 8%<br>2) 23%<br>3) 68%  |
| (PEO-b-PCL <sub>2</sub> /Tw80)/HPβCD    | 80:20      | 166                                              | 0.4 <sub>6</sub>       | 3                      | 1) 3<br>2) 12<br>3) 123                        | 1) 9%<br>2) 24%<br>3) 67%  |
| (PEO-b-PCL <sub>3</sub> /Tw80)/HPβCD    | 80:20      | 41                                               | 0.5 <sub>1</sub>       | 3                      | 1) 3<br>2) 11<br>3) 78                         | 1) 6%<br>2) 26%<br>3) 67%  |

**C. Dispersed in buffer solution pH=5.6 at 34 °C**

| <b>Colloidal dispersions</b>         | <b>w/w</b> | <b>R<sub>h</sub> (Cumulant)<br/>(nm)<sup>1</sup></b> | <b>PDI<sup>2</sup></b> | <b>Number of<br/>peaks</b> | <b>R<sub>h</sub> (Contin)<br/>(nm)<sup>3</sup></b> | <b>Weight of<br/>Peak (%)</b> |
|--------------------------------------|------------|------------------------------------------------------|------------------------|----------------------------|----------------------------------------------------|-------------------------------|
| (PEO-b-PCL <sub>1</sub> /Tw80)/MβCD  | 80:20      | 87                                                   | 0.3 <sub>6</sub>       | 2                          | 1) 12<br>2) 120                                    | 1) 8%<br>2) 92%               |
| (PEO-b-PCL <sub>2</sub> /Tw80)/MβCD  | 80:20      | 67                                                   | 0.4 <sub>8</sub>       | 2                          | 1) 14<br>2) 122                                    | 1) 16%<br>2) 83%              |
| (PEO-b-PCL <sub>3</sub> /Tw80)/MβCD  | 80:20      | 38                                                   | 0.4 <sub>1</sub>       | 2                          | 1) 22<br>2) 119                                    | 1) 49%<br>2) 51%              |
| (PEO-b-PCL <sub>1</sub> /Tw80)/HPβCD | 80:20      | 90                                                   | 0.3 <sub>3</sub>       | 2                          | 1) 14<br>2) 117                                    | 1) 6%<br>2) 94%               |
| (PEO-b-PCL <sub>2</sub> /Tw80)/HPβCD | 80:20      | 70                                                   | 0.4 <sub>9</sub>       | 2                          | 1) 14<br>2) 136                                    | 1) 17%<br>2) 82%              |
| (PEO-b-PCL <sub>3</sub> /Tw80)/HPβCD | 80:20      | 37                                                   | 0.4 <sub>2</sub>       | 2                          | 1) 22<br>2) 129                                    | 1) 52%<br>2) 48%              |

<sup>1</sup> R<sub>h</sub> indicates the average hydrodynamic radius of three replicates of each sample obtained by the Cumulant method

<sup>2</sup> PDI indicates the average polydispersity index

<sup>3</sup> R<sub>h</sub> indicates the average hydrodynamic radius of three replicates of each sample obtained by the Contin method

**Table S5.** The physicochemical characteristics of ternary systems and RH-loaded ternary systems, using water-HPLC grade as a dispersion medium.

| Dispersed in Water-HPLC grade           |       |                                                |                  |                              |                                                              |                       |
|-----------------------------------------|-------|------------------------------------------------|------------------|------------------------------|--------------------------------------------------------------|-----------------------|
| Colloidal dispersions                   | w/w   | R <sub>h</sub> (Cumulant)<br>(nm) <sup>1</sup> | PDI <sup>2</sup> | Number of<br>peaks           | R <sub>h</sub><br>(Contin)<br>(nm) <sup>3</sup>              | Weight of<br>Peak (%) |
| (PEO-b-PCL <sub>1</sub> /Tw80)/MβCD     | 80:20 | 87                                             | 0.3 <sub>6</sub> | 2                            | 1) 12<br>2) 116                                              | 1) 7%<br>2) 93%       |
| (PEO-b-PCL <sub>1</sub> /Tw80/MβCD)/RH  | 10:1  | 38                                             | 0.4 <sub>9</sub> | 2                            | 1) 9<br>2) 75                                                | 1) 20%<br>2) 80%      |
| (PEO-b-PCL <sub>1</sub> /Tw80/MβCD)/RH  | 10:5  | 72                                             | 0.5 <sub>1</sub> | 2                            | 1) 9<br>2) 102                                               | 1) 20%<br>2) 80%      |
| (PEO-b-PCL <sub>1</sub> /Tw80)/HPβCD    | 80:20 | 91                                             | 0.3 <sub>6</sub> | 2                            | 1) 10<br>2) 99                                               | 1) 5%<br>2) 95%       |
| (PEO-b-PCL <sub>1</sub> /Tw80/HPβCD)/RH | 10:1  | 47                                             | 0.5 <sub>0</sub> | 2                            | 1) 10<br>2) 68                                               | 1) 20%<br>2) 80%      |
| (PEO-b-PCL <sub>1</sub> /Tw80/HPβCD)/RH | 10:5  | 51                                             | 0.5 <sub>3</sub> | 2 not<br>separated<br>curves | 1 <sup>st</sup> peak ~12 nm<br>2 <sup>nd</sup> peak ~ 110 nm |                       |
| (PEO-b-PCL <sub>2</sub> /Tw80)/MβCD     | 80:20 | 69                                             | 0.4 <sub>7</sub> | 2                            | 1) 13<br>2) 120                                              | 1) 14%<br>2) 85%      |
| (PEO-b-PCL <sub>2</sub> /Tw80/MβCD)/RH  | 10:1  | 22                                             | 0.4 <sub>3</sub> | 2                            | 1) 14<br>2) 97                                               | 1) 55%<br>2) 45%      |
| (PEO-b-PCL <sub>2</sub> /Tw80/MβCD)/RH  | 10:5  | 21                                             | 0.4 <sub>5</sub> | 2                            | 1) 14<br>2) 150                                              | 1) 61%<br>2) 39%      |
| (PEO-b-PCL <sub>2</sub> /Tw80)/HPβCD    | 80:20 | 70                                             | 0.4 <sub>9</sub> | 2                            | 1) 14<br>2) 136                                              | 1) 17%<br>2) 82%      |
| (PEO-b-PCL <sub>2</sub> /Tw80/HPβCD)/RH | 10:1  | 20                                             | 0.4 <sub>2</sub> | 1                            | 18                                                           | 100%                  |
| (PEO-b-PCL <sub>2</sub> /Tw80/HPβCD)/RH | 10:5  | 23                                             | 0.4 <sub>3</sub> | 1                            | 30                                                           | 100%                  |
| (PEO-b-PCL <sub>3</sub> /Tw80)/MβCD     | 80:20 | 39                                             | 0.4 <sub>3</sub> | 2                            | 1) 19<br>2) 96                                               | 1) 38%<br>2) 62%      |
| (PEO-b-PCL <sub>3</sub> /Tw80/MβCD)/RH  | 10:1  | 26                                             | 0.1 <sub>5</sub> | 1                            | 25                                                           | 100%                  |
| (PEO-b-PCL <sub>3</sub> /Tw80/MβCD)/RH  | 10:5  | 27                                             | 0.2 <sub>0</sub> | 1                            | 25                                                           | 100%                  |

|                                         |       |    |                  |   |                 |                  |
|-----------------------------------------|-------|----|------------------|---|-----------------|------------------|
| (PEO-b-PCL <sub>3</sub> /Tw80)/HPβCD    | 80:20 | 37 | 0.4 <sub>7</sub> | 2 | 1) 17<br>2) 88  | 1) 40%<br>2) 60% |
| (PEO-b-PCL <sub>3</sub> /Tw80/HPβCD)/RH | 10:1  | 29 | 0.3 <sub>7</sub> | 2 | 1) 22<br>2) 221 | 1) 71%<br>2) 29% |
| (PEO-b-PCL <sub>3</sub> /Tw80/HPβCD)/RH | 10:5  | 25 | 0.1 <sub>8</sub> | 1 | 23              | 100%             |

<sup>1</sup> R<sub>h</sub> indicates the average hydrodynamic radius of three replicates of each sample obtained by the Cumulant method

<sup>2</sup> PDI indicates the average polydispersity index

<sup>3</sup> R<sub>h</sub> indicates the average hydrodynamic radius of three replicates of each sample obtained by the Contin method



**Table S6.** Regression analysis of the amount of RH permeated per unit area vs. time (up to 120 min) for formulations F1-F12 and RH solution (0.5 mg/mL). Flux (J) (mean  $\pm$  SD, n=3) and R-square (mean  $\pm$  SD, n=3) values are presented.

| Formulation (F)         | J ( $\mu\text{g}/\text{cm}^2/\text{min}$ ) | R-square              |
|-------------------------|--------------------------------------------|-----------------------|
| F1                      | 0.00052 $\pm$ 0.00009                      | 0.87162 $\pm$ 0.00916 |
| F2                      | 0.00058 $\pm$ 0.00008                      | 0.91827 $\pm$ 0.00798 |
| F3                      | 0.00053 $\pm$ 0.00007                      | 0.92526 $\pm$ 0.00700 |
| F4                      | 0.00059 $\pm$ 0.00007                      | 0.93570 $\pm$ 0.00722 |
| F5                      | 0.00053 $\pm$ 0.00007                      | 0.92321 $\pm$ 0.00706 |
| F6                      | 0.00057 $\pm$ 0.00007                      | 0.92699 $\pm$ 0.00745 |
| F7                      | 0.00051 $\pm$ 0.00005                      | 0.94937 $\pm$ 0.00541 |
| F8                      | 0.00061 $\pm$ 0.00008                      | 0.91191 $\pm$ 0.00875 |
| F9                      | 0.00043 $\pm$ 0.00006                      | 0.92526 $\pm$ 0.00570 |
| F10                     | 0.00053 $\pm$ 0.00006                      | 0.93590 $\pm$ 0.00646 |
| F11                     | 0.00042 $\pm$ 0.00007                      | 0.88415 $\pm$ 0.00699 |
| F12                     | 0.00059 $\pm$ 0.00006                      | 0.94367 $\pm$ 0.00666 |
| RH solution (0.5 mg/mL) | 0.00060 $\pm$ 0.00008                      | 0.91575 $\pm$ 0.00845 |

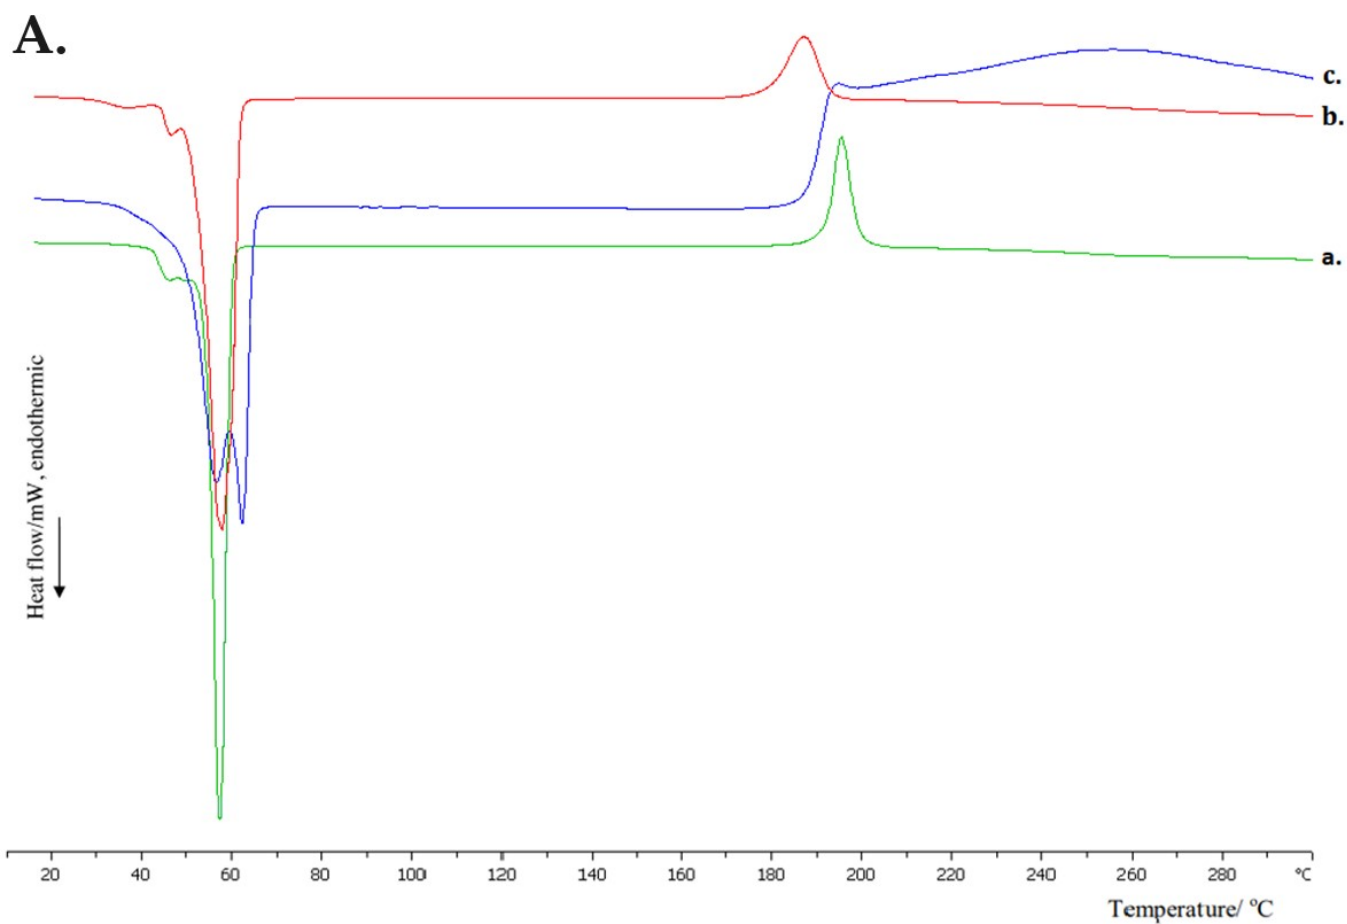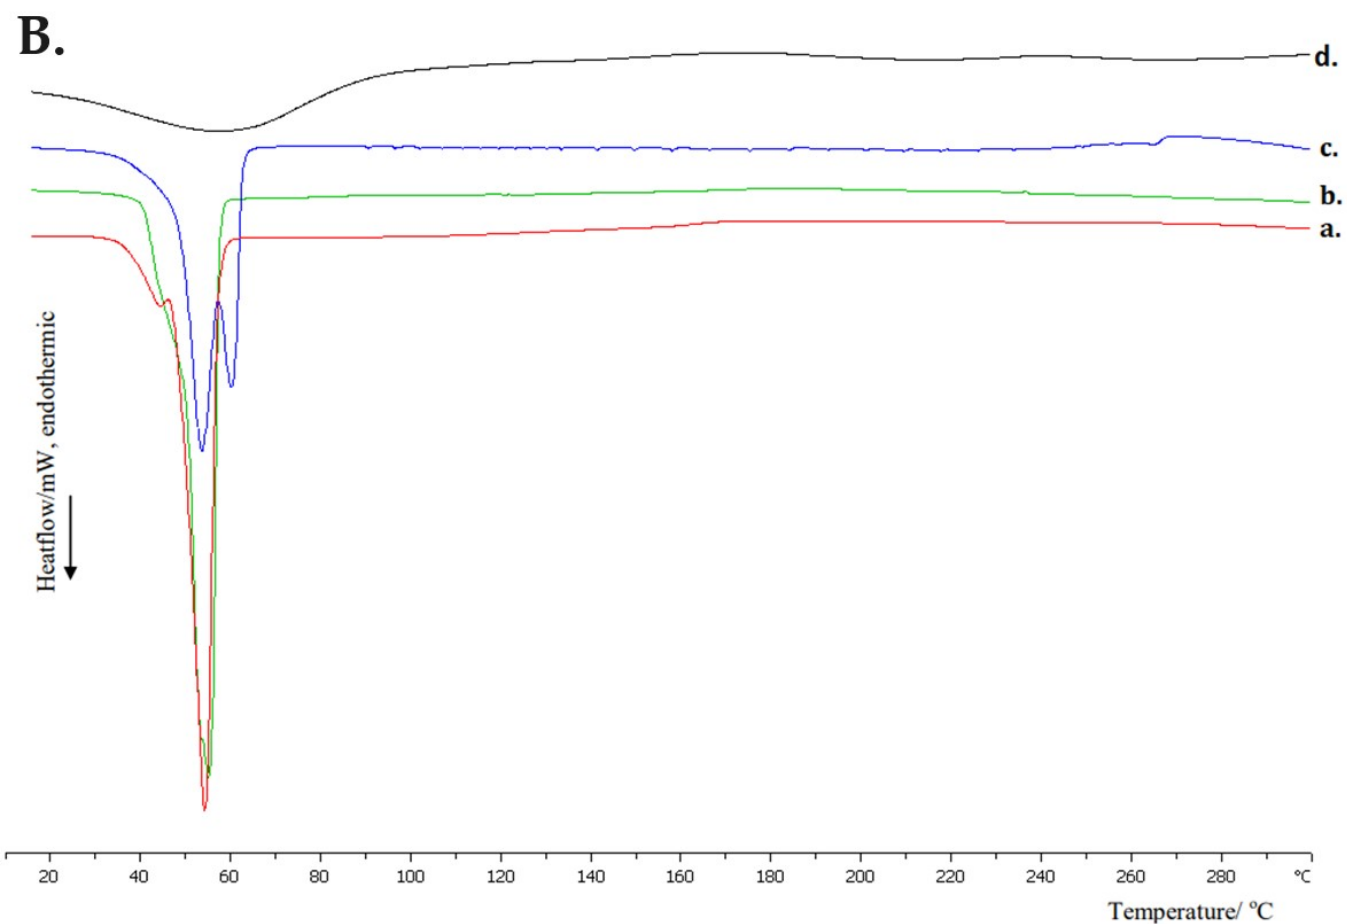

**Figure S1.** DSC thermograms. The heating curves of **A.** **a.** PEO-b-PCL<sub>2</sub>, **b.** PEO-b-PCL<sub>3</sub>, **c.** PEO-b-PCL<sub>1</sub>, and **B.** **a.** PEO-b-PCL<sub>3</sub>/Tw80, **b.** PEO-b-PCL<sub>1</sub>/Tw80, **c.** PEO-b-PCL<sub>2</sub>/Tw80, **d.** Tw80.

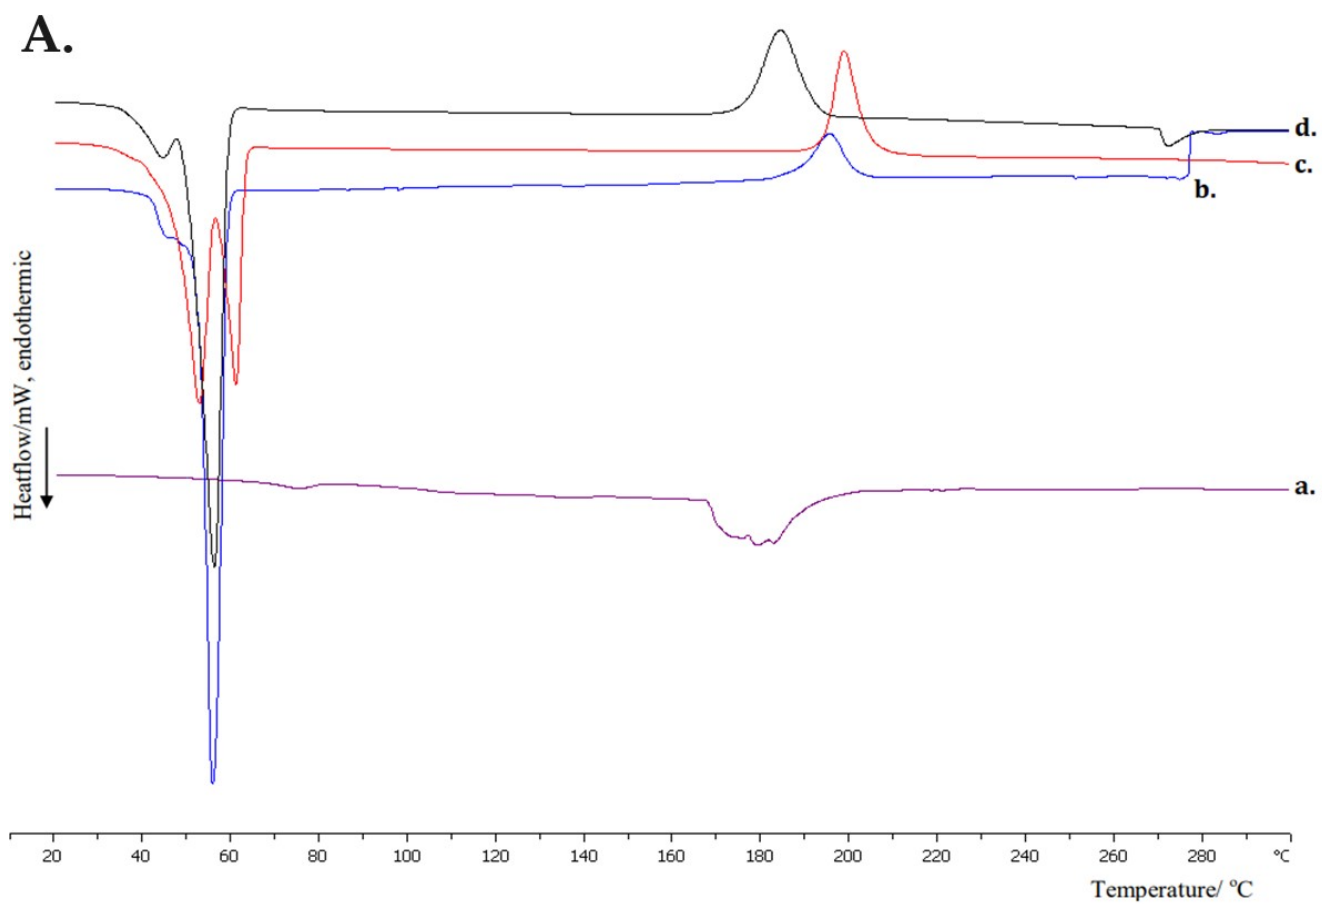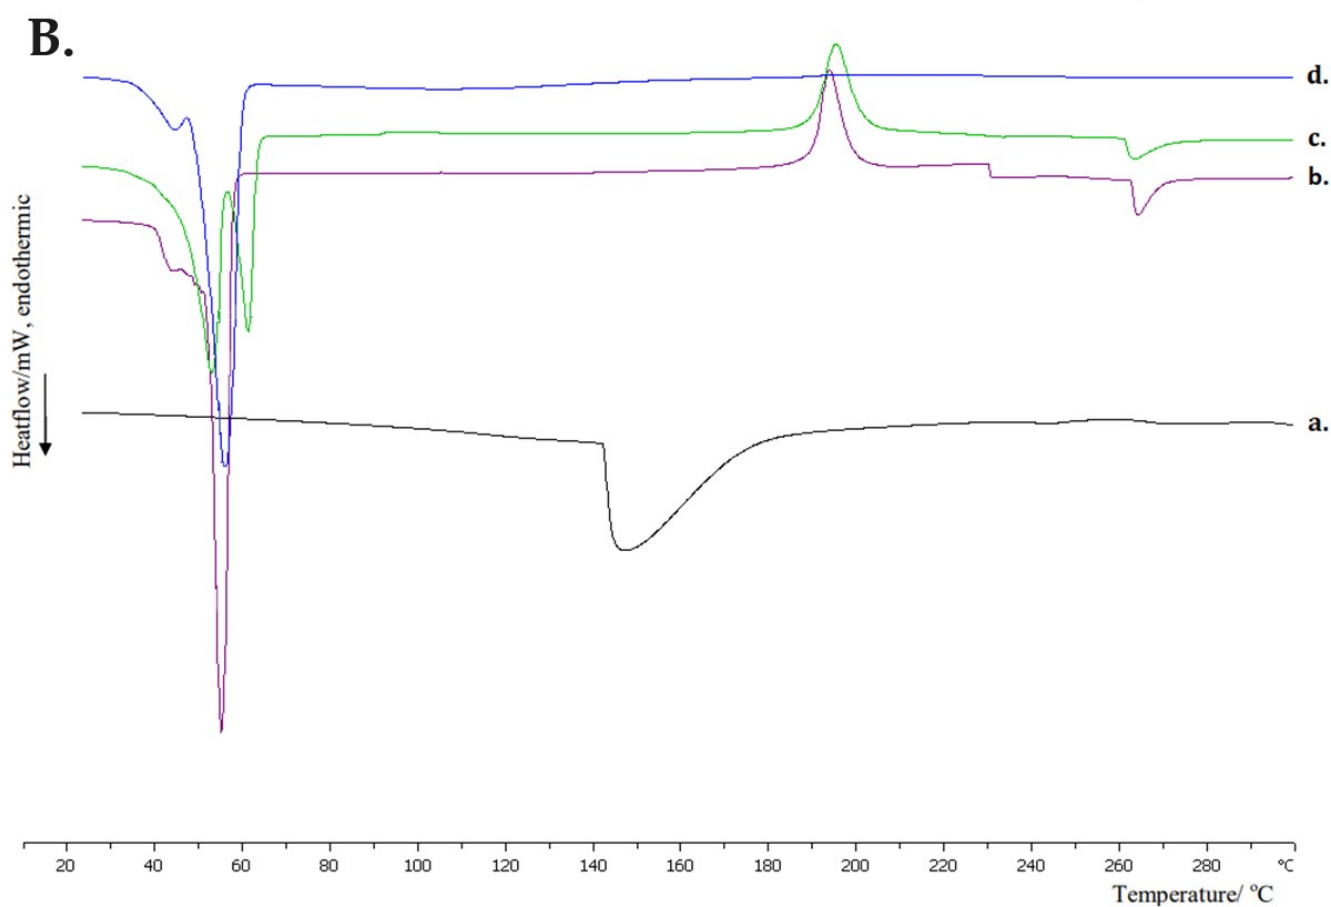

**Figure S2.** DSC thermograms. The heating curves of **A. a.** M $\beta$ CD, **b.** PEO-b-PCL<sub>1</sub>/M $\beta$ CD, **c.** PEO-b-PCL<sub>2</sub>/M $\beta$ CD, **d.** PEO-b-PCL<sub>3</sub>/M $\beta$ CD, and **B. a.** HP $\beta$ CD, **b.** PEO-b-PCL<sub>1</sub>/HP $\beta$ CD, **c.** PEO-b-PCL<sub>2</sub>/HP $\beta$ CD, **d.** PEO-b-PCL<sub>3</sub>/HP $\beta$ CD.

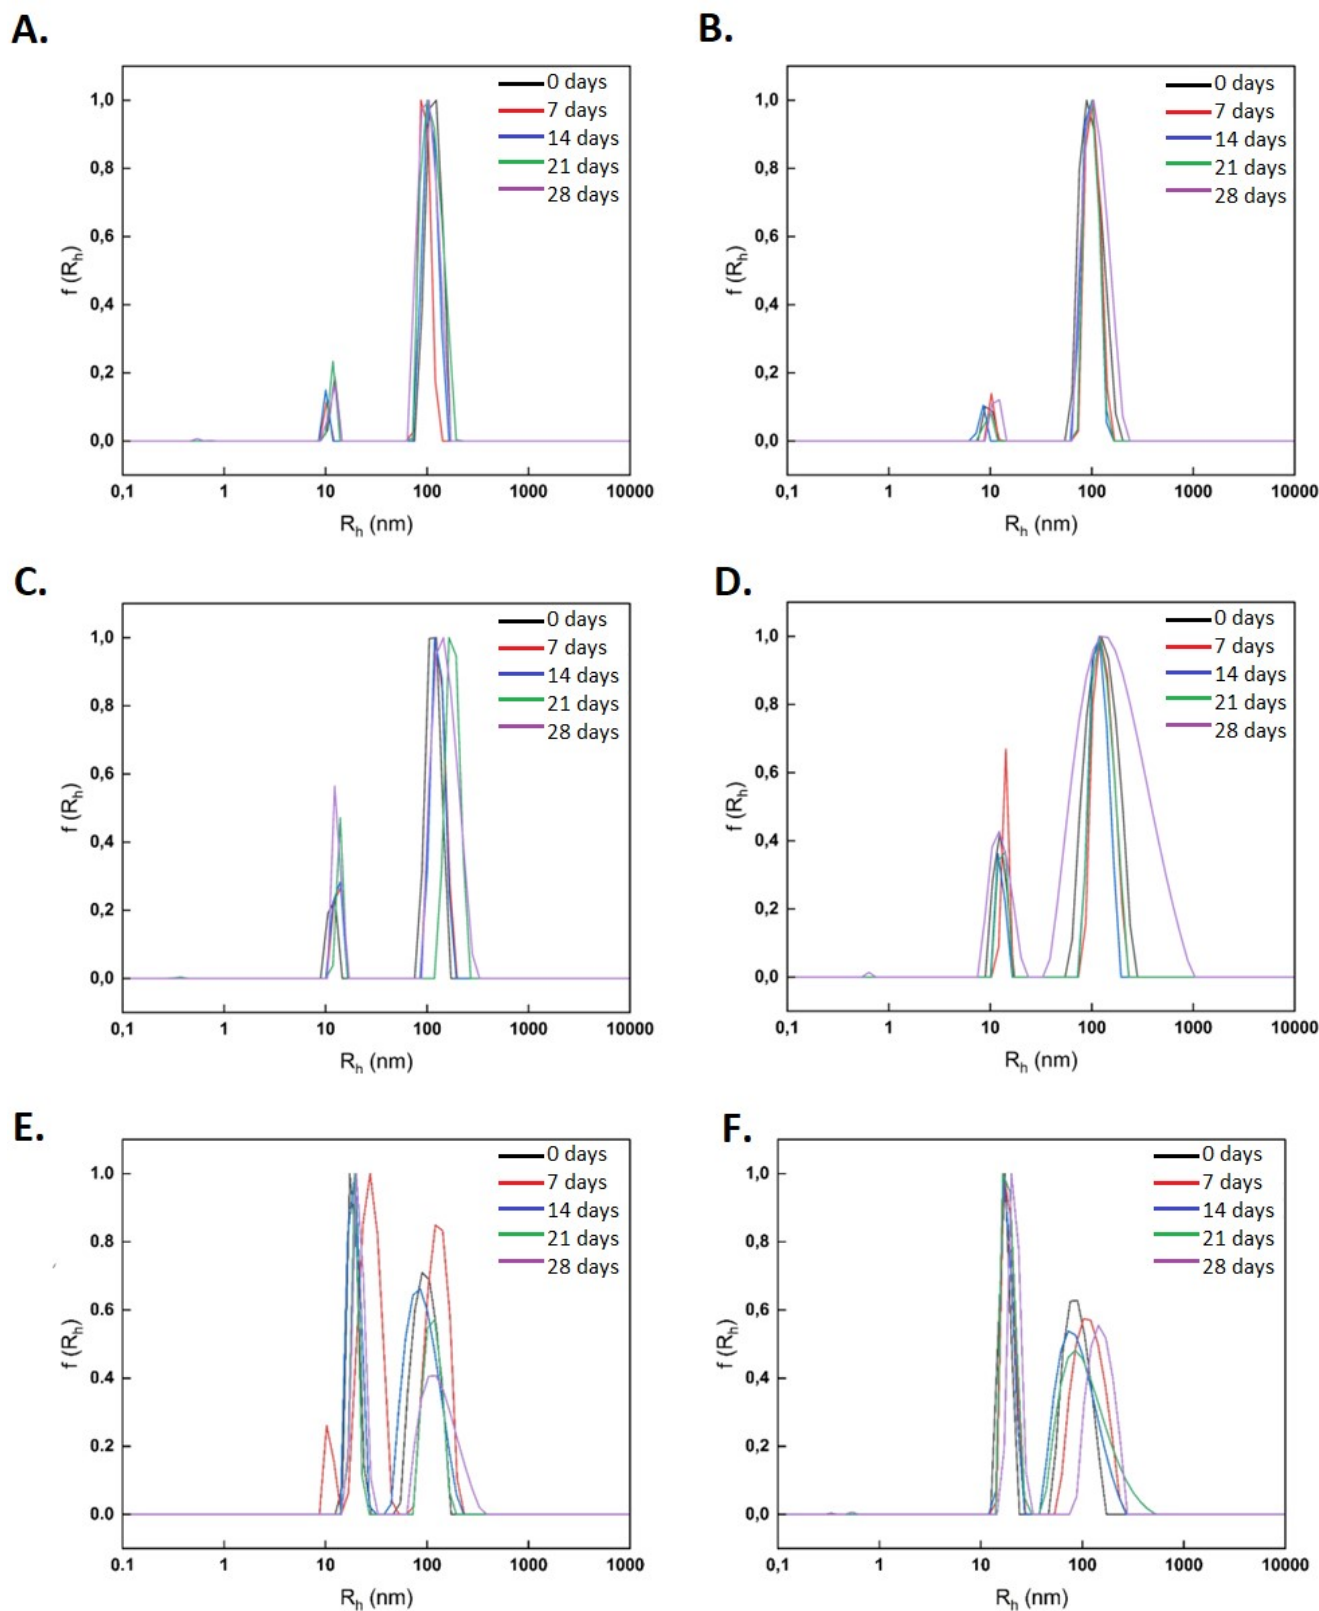

**Figure S3.** Stability assessment of ternary systems **A.** PEO-b-PCL<sub>1</sub>/Tw80/MβCD, **B.** PEO-b-PCL<sub>1</sub>/Tw80/HPβCD, **C.** PEO-b-PCL<sub>2</sub>/Tw80/MβCD, **D.** PEO-b-PCL<sub>2</sub>/Tw80/HPβCD, **E.** PEO-b-PCL<sub>3</sub>/Tw80/MβCD, **F.** PEO-b-PCL<sub>3</sub>/Tw80/HPβCD systems through  $R_h$  measurements during the 28-day period.

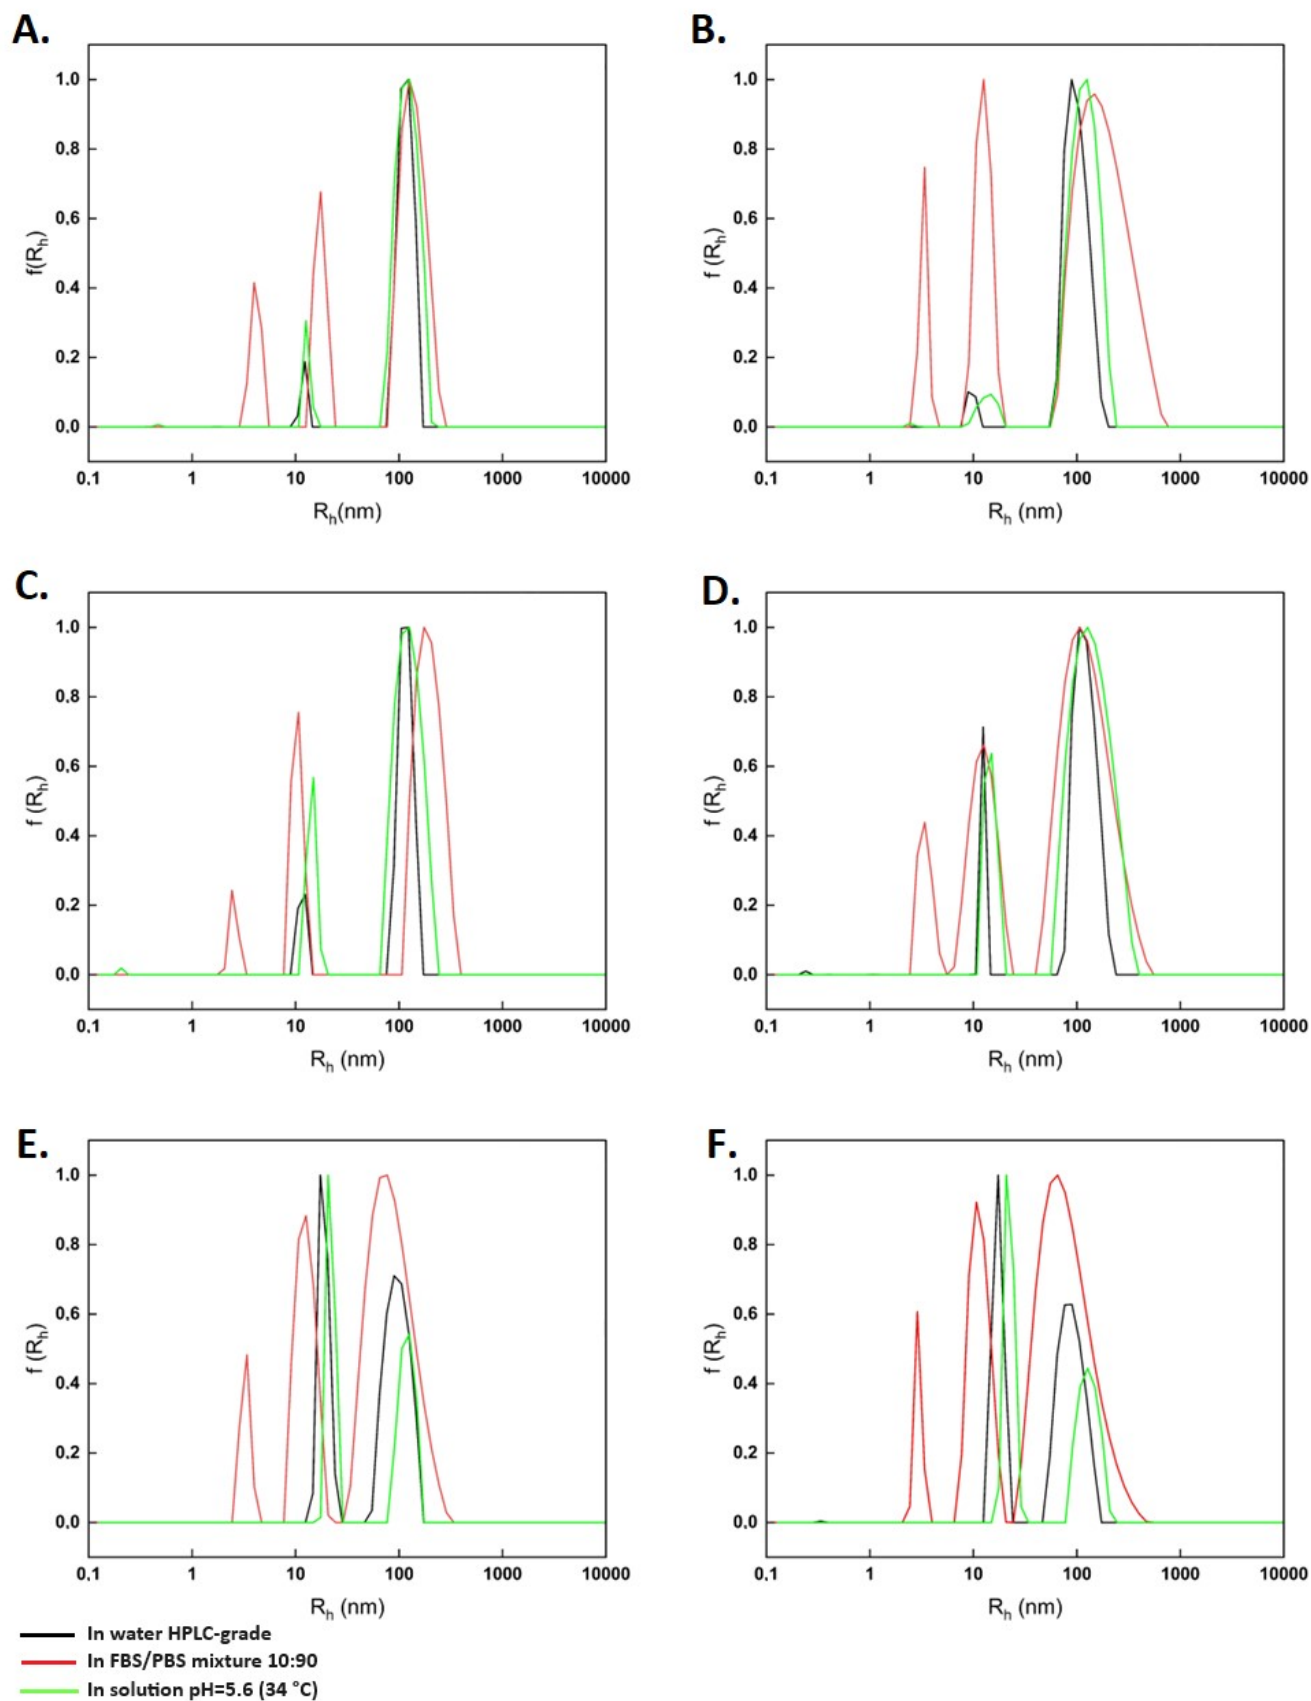

**Figure S4.** Size distribution for the **A.** PEO-b-PCL<sub>1</sub>/Tw80/M $\beta$ CD, **B.** PEO-b-PCL<sub>1</sub>/Tw80/HP $\beta$ CD, **C.** PEO-b-PCL<sub>2</sub>/Tw80/M $\beta$ CD, **D.** PEO-b-PCL<sub>2</sub>/Tw80/HP $\beta$ CD, **E.** PEO-b-PCL<sub>3</sub>/Tw80/M $\beta$ CD, **F.** PEO-b-PCL<sub>3</sub>/Tw80/HP $\beta$ CD systems in different dispersion media using the thin-film hydration method ( $t=0$  days).

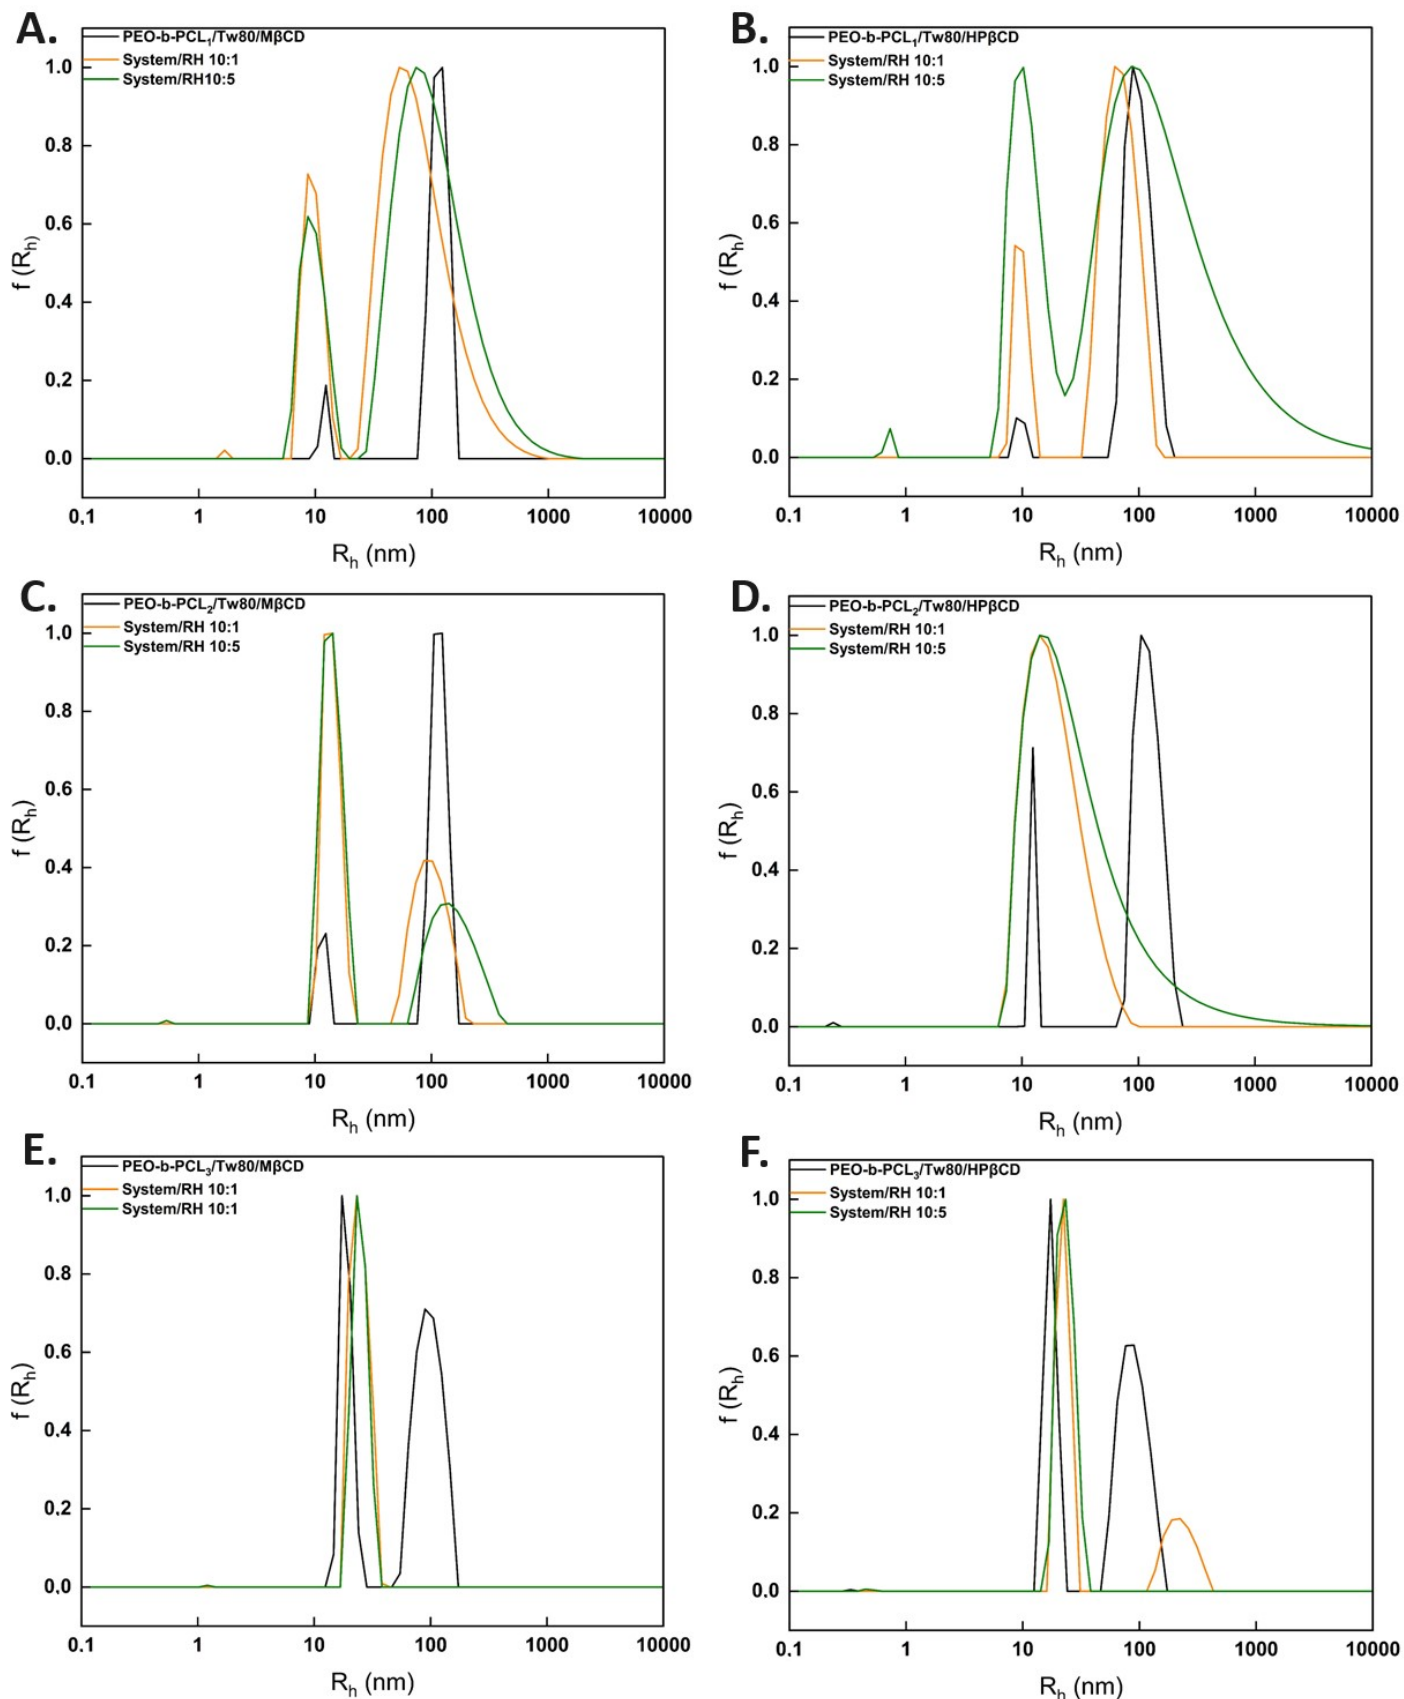

**Figure S5.** Size distribution for the colloidal dispersions of **A.** PEO-b-PCL<sub>1</sub>/Tw80/MβCD and PEO-b-PCL<sub>1</sub>/Tw80/MβCD/RH, **B.** PEO-b-PCL<sub>1</sub>/Tw80/HPβCD and PEO-b-PCL<sub>1</sub>/Tw80/HPβCD/RH, **C.** PEO-b-PCL<sub>2</sub>/Tw80/MβCD and PEO-b-PCL<sub>2</sub>/Tw80/MβCD/RH, **D.** PEO-b-PCL<sub>2</sub>/Tw80/HPβCD and PEO-b-PCL<sub>2</sub>/Tw80/HPβCD/RH, **E.** PEO-b-PCL<sub>3</sub>/Tw80/MβCD and PEO-b-PCL<sub>3</sub>/Tw80/MβCD/RH, **F.** PEO-b-PCL<sub>3</sub>/Tw80/HPβCD and PEO-b-PCL<sub>3</sub>/Tw80/HPβCD/RH in weight ratios of 10:1 and 10:5 in aqueous solutions using the thin-film hydration method (t=0 days).

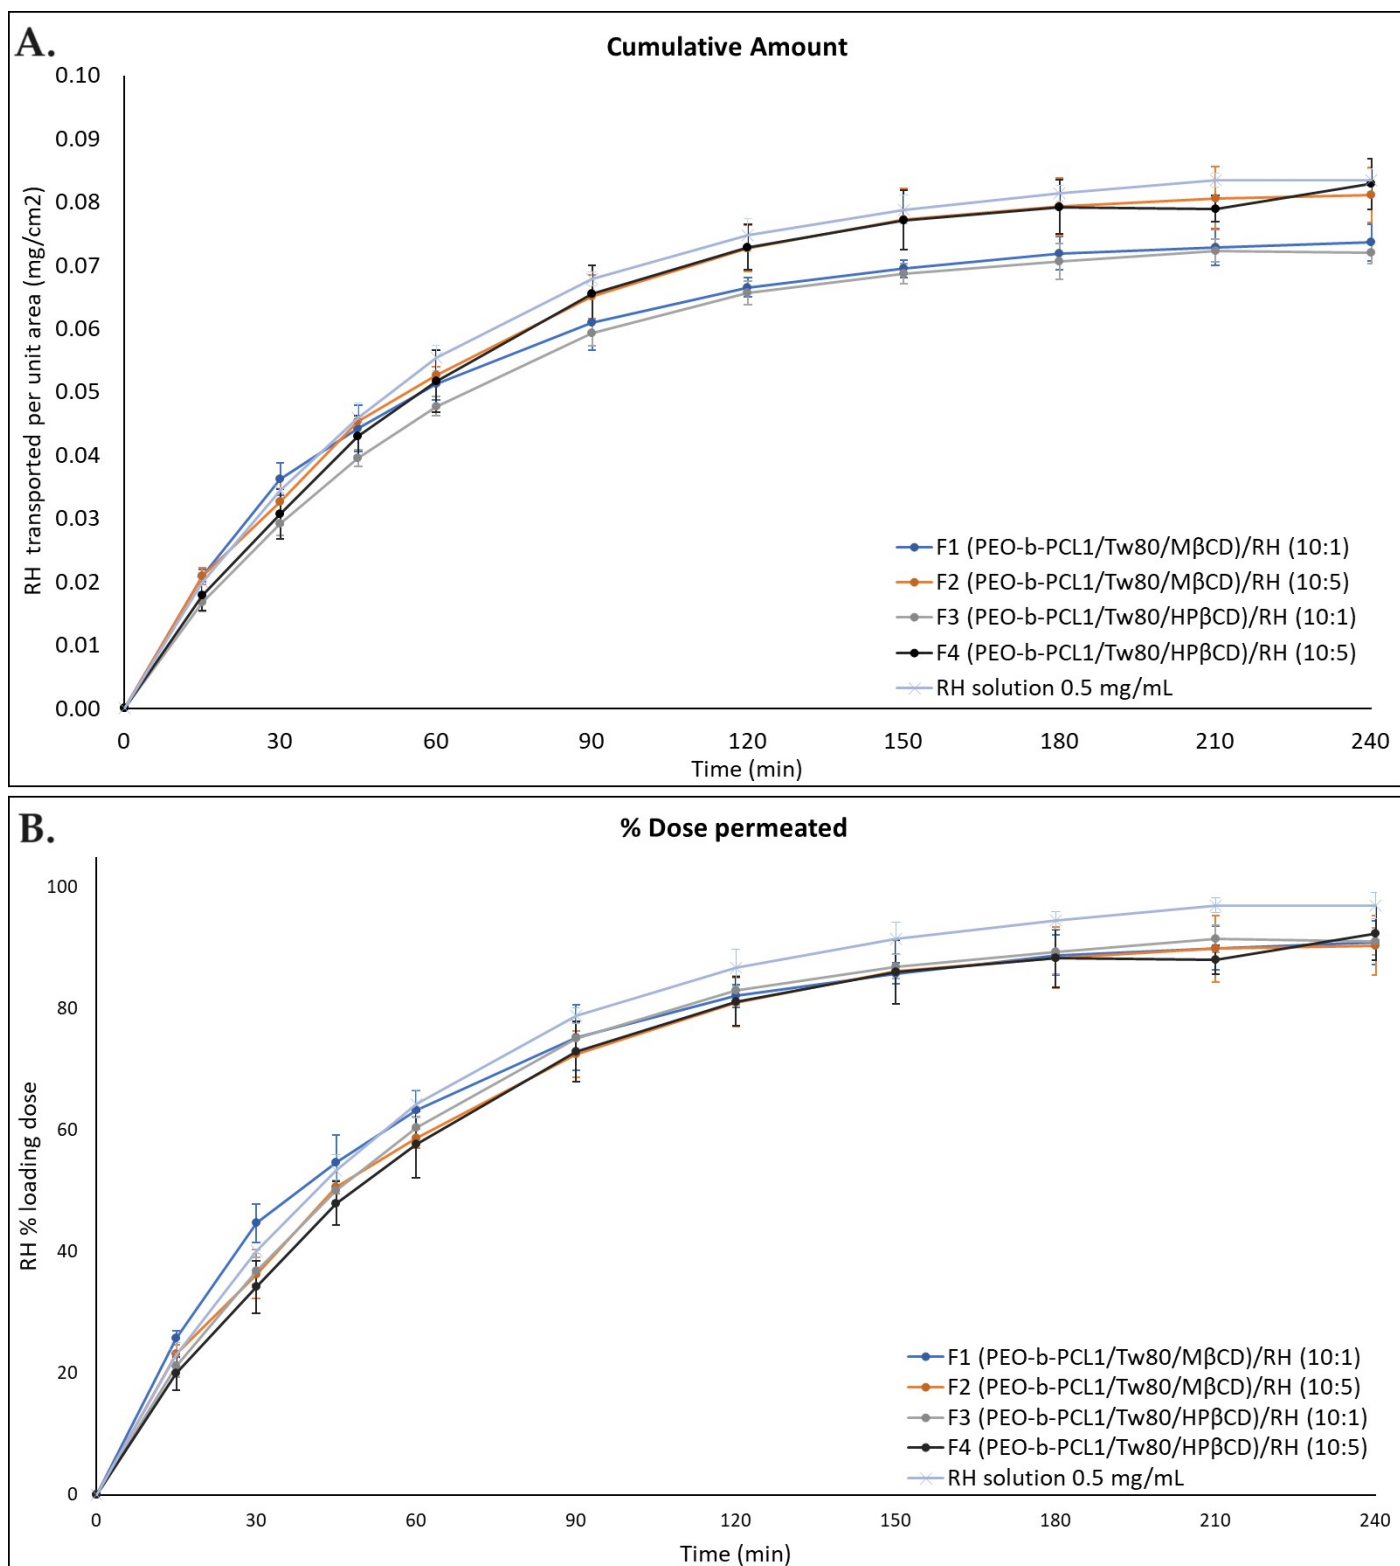

**Figure S6.** Permeation profiles through regenerated cellulose membranes for the colloidal dispersion of RH-loaded PEO-b-PCL<sub>1</sub> hybrid systems at the weight ratios of 10:1 and 10:5 at the buffer solution pH=5.6, compared to the RH solution (0.5 mg/mL, pH=5.6) expressed as **A.** quantity permeated per unit area (mean  $\pm$  SD, n=3) and **B.** % loading dose permeated for the tested formulation (mean  $\pm$  SD, n=3).

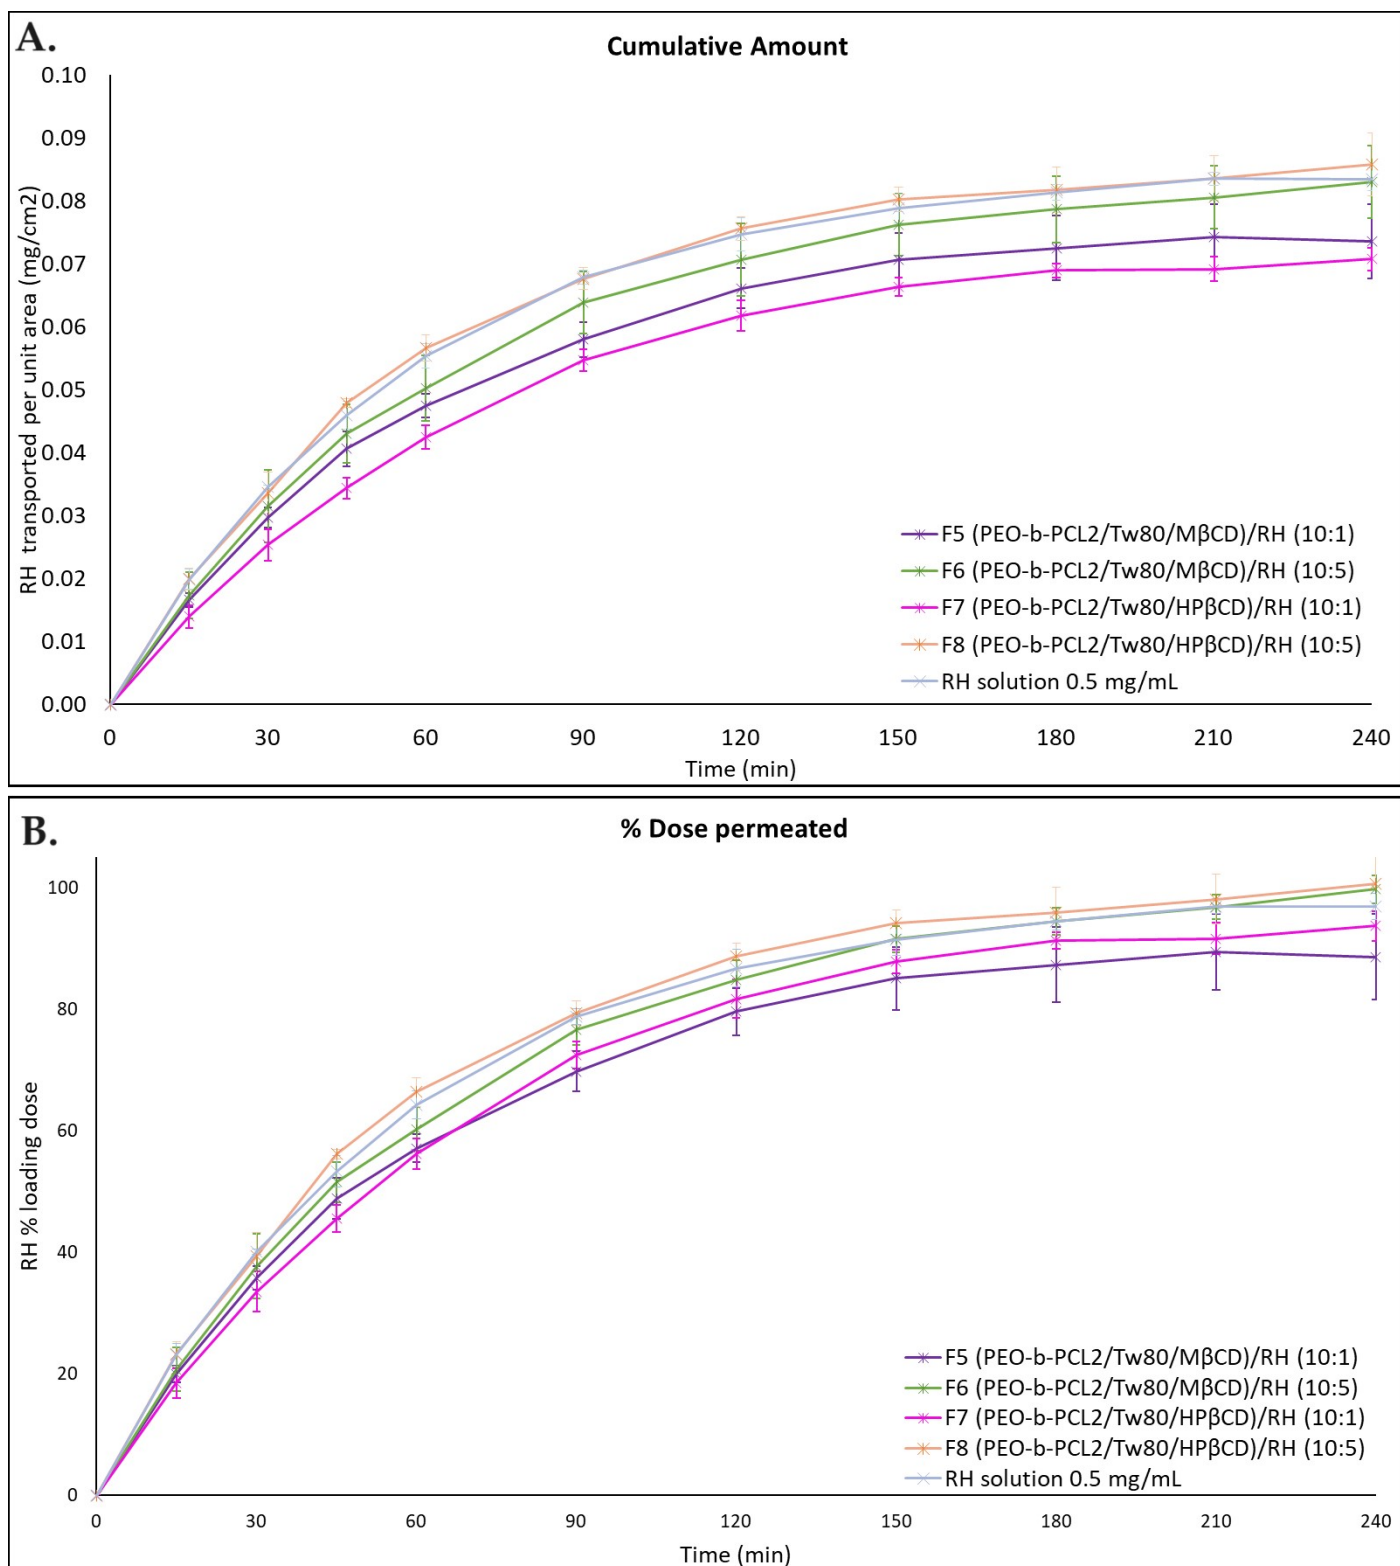

**Figure S7.** Permeation profiles through regenerated cellulose membranes for the colloidal dispersion of RH-loaded PEO-b-PCL<sub>2</sub> hybrid systems at the weight ratios of 10:1 and 10:5 at the buffer solution pH=5.6, compared to the RH solution (0.5 mg/mL, pH=5.6) expressed as **A.** quantity permeated per unit area (mean  $\pm$  SD, n=3) and **B.** % loading dose permeated for the tested formulation (mean  $\pm$  SD, n=3).



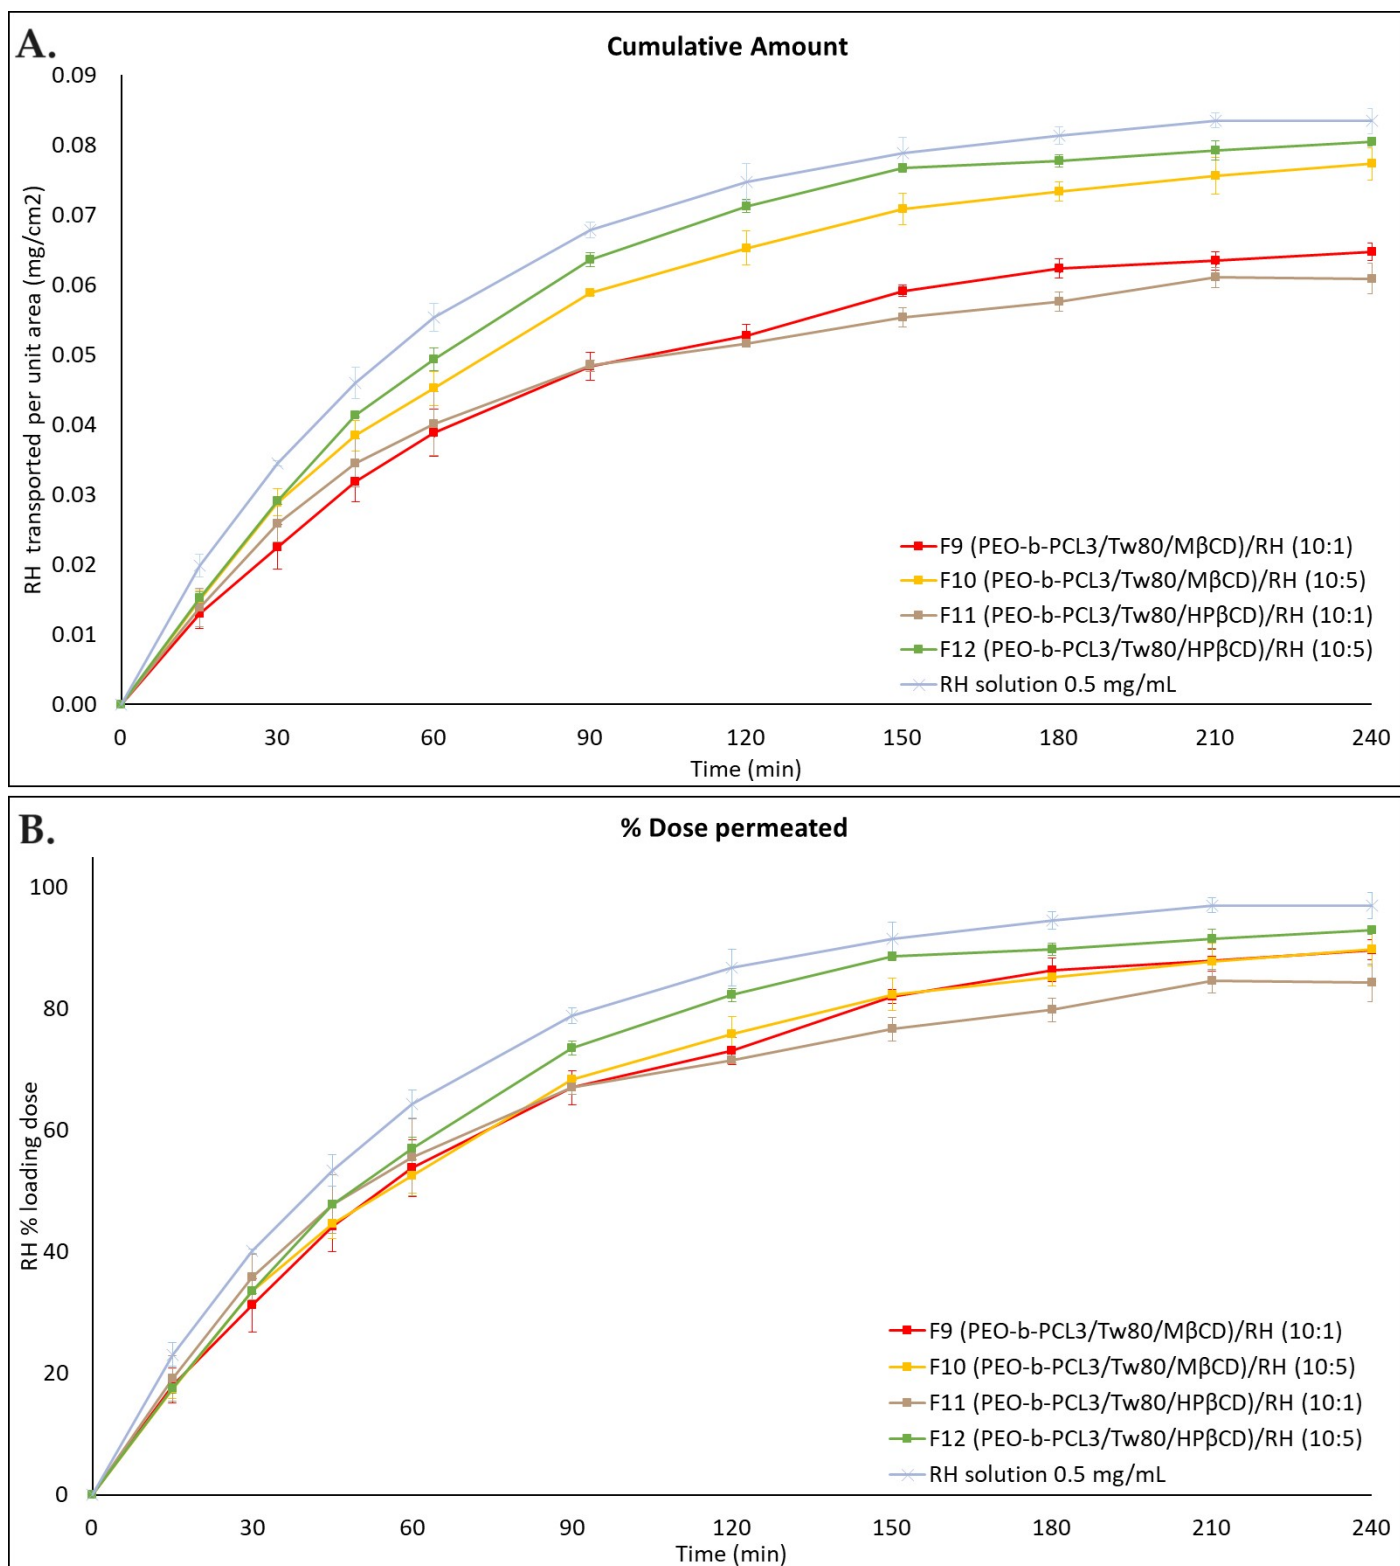

**Figure S8.** Permeation profiles through regenerated cellulose membranes for the colloidal dispersion of RH-loaded PEO-b-PCL<sub>3</sub> hybrid systems at the weight ratios of 10:1 and 10:5 at the buffer solution pH=5.6, compared to the RH solution (0.5 mg/mL, pH=5.6) expressed as **A.** quantity permeated per unit area (mean  $\pm$  SD, n=3) and **B.** % loading dose permeated for the tested formulation (mean  $\pm$  SD, n=3).
